1 **Direct Metatranscriptome RNA-seq and Multiplex RT-PCR Amplicon Sequencing on**  
2 **Nanopore MinION – Promising Strategies for Multiplex Identification of Viable Pathogens**  
3 **in Food.**

4  
5 **Author list**

6 Manyun Yang<sup>1\*</sup>, Alyssa Cousineau<sup>2\*\*†</sup>, Xiaobo Liu<sup>1\*†</sup>, Daniel Sun<sup>2,3</sup>, Shaohua Li<sup>2,4</sup>, Tingting Gu<sup>1</sup>,  
7 Luo Sun<sup>2</sup>, Yaguang Luo<sup>4</sup>, Mingqun Xu<sup>2#</sup>, Boce Zhang<sup>1#</sup>

8  
9 <sup>1</sup>Department of Biomedical and Nutritional Sciences, University of Massachusetts, Lowell, MA  
10 01854.

11 <sup>2</sup>New England Biolabs, Inc. Ipswich, MA 01938.

12 <sup>3</sup>Department of Chemistry, Brandeis University, Waltham, MA 02453.

13 <sup>4</sup>U.S. Food and Drug Administration, Silver Spring, MD 20993.

14 <sup>5</sup>Agricultural Research Service, U.S. Department of Agriculture, Beltsville, MD 20705.

15 \*These authors contributed equally.

16 # Boce Zhang: [boce\\_zhang@uml.edu](mailto:boce_zhang@uml.edu); Mingqun Xu: [xum@neb.com](mailto:xum@neb.com).

17

18

19 **Abstract**

20 Viable pathogenic bacteria are major biohazards that pose a significant threat to food safety.  
21 Despite the recent developments in detection platforms, multiplex identification of viable  
22 pathogens in food remains a major challenge. A novel strategy is developed through direct  
23 metatranscriptome RNA-seq and multiplex RT-PCR amplicon sequencing on Nanopore MinION  
24 to achieve real-time multiplex identification of viable pathogen in food. Specifically, this study  
25 reports an optimized universal Nanopore sample extraction and library preparation protocol  
26 applicable to both Gram-positive and Gram-negative pathogenic bacteria, demonstrated using a  
27 cocktail culture of *E. coli* O157:H7, *Salmonella enteritidis*, and *Listeria monocytogenes*, which  
28 were selected based on their impact on economic loss or prevalence in recent outbreaks. Further  
29 evaluation and validation confirmed the accuracy of direct metatranscriptome RNA-seq and  
30 multiplex RT-PCR amplicon sequencing using Sanger sequencing and selective media. The study  
31 also included a comparison of different bioinformatic pipelines for metatranscriptomic and  
32 amplicon genomic analysis. MEGAN without rRNA mapping showed the highest accuracy of  
33 multiplex identification using the metatranscriptomic data. EPI2ME also demonstrated high  
34 accuracy using multiplex RT-PCR amplicon sequencing. In addition, a systemic comparison was  
35 drawn between Nanopore sequencing of the direct metatranscriptome RNA-seq and RT-PCR  
36 amplicons. Both methods are comparable in accuracy and time. Nanopore sequencing of RT-PCR  
37 amplicon has higher sensitivity, but Nanopore metatranscriptome sequencing excels in read length  
38 and dealing with complex microbiome and non-bacterial transcriptome backgrounds. To the best  
39 of our knowledge, this is the first report of metatranscriptome sequencing of cocktail microbial  
40 RNAs on the emerging Nanopore platform. Direct RNA-seq and RT-PCR amplicons sequencing  
41 of metatranscriptome enable the direct identification of nucleotide analogs in RNAs, which is

42 highly informative for determining microbial identities while detecting ecologically relevant  
43 processes. The information pertained in this study could be important for future revelatory research,  
44 including predicting antibiotic resistance, elucidating host-pathogen interaction, prognosing  
45 disease progression, and investigating microbial ecology, etc.

46

47 **Keywords:** Multiplex Identification, Viable Pathogens, Nanopore, Metatranscriptome, Multiplex  
48 RT-PCR

49

50

51 **Introduction**

52 Biological threats, including bacteria, viruses, and parasites, remain as the top food safety  
53 challenge in the United States. According to the CDC surveillance for foodborne disease outbreaks  
54 most recent annual report, in 2016 outbreaks attributed to bacterial infection comprised 44% of the  
55 total 645 outbreaks and caused 76% of the 847 hospitalization cases (1). More importantly, a recent  
56 report published by U.S. Department of Agriculture Economic Research Service (USDA ERS)  
57 stated that food safety challenges caused an annual loss of \$15.5 billion to the economy and the  
58 top 10 infectious bacteria alone contribute to \$10 billion in economic loss (2). These statistics  
59 revealed that bacterial infection is the primary concern among all biological threats. To cope with  
60 the threat of bacterial infection to public health, the demand for a rapid and highly sensitive method  
61 to detect and identify bacterial pathogens in food is enormous and becoming more urgent,  
62 especially after the implementation of the Food Safety Modernization Act (FSMA) in  
63 2011. Commercial food safety testing methods include traditional plate counting methods,  
64 immunological techniques such as enzyme-linked immunosorbent assay (ELISA), lateral flow  
65 immunoassay chip, and electrochemical biosensors, chromatography, as well as nucleic acid-based  
66 approaches (3). As summarized in Table S1, the widely recognized cultivation methods and  
67 commercial rapid detection systems that are available for food defense applications have major  
68 limitations, such as large sample size, long turnaround time, and intensive labor demands. Rapid  
69 detection systems also failed to address unique changes to food safety and food defense, despite  
70 the recent success in medical and clinical diagnostics.

71

72 There are two major unique challenges in food defense, especially in identifying biohazards in  
73 food. First, viable bacteria are the etiological agents of foodborne illnesses. Most rapid detection

74 methods have limited discretionary power to identify bacterial viability (summarized in Table S1).  
75 Current genome-based technology includes polymerase chain reaction (PCR), real-time PCR  
76 (qPCR), fluorescence *in situ* hybridization (FISH), nucleic acid sequence-based amplification  
77 (NASBA), and loop-mediated isothermal amplification (LAMP). PCR based methods are sensitive  
78 and specific but easily generate cross contamination between pre-PCR and post-PCR products.  
79 Insufficient permeability of cell walls and the inherent autofluorescence of the substrate will  
80 decrease the efficiency of FISH (4). NASBA and LAMP do not require a thermocycler, however,  
81 NASBA shows a size range limitation of target RNA and LAMP requires complex primer design  
82 that cannot be adapted to multiplex amplification (5). In addition, all these approaches suffer from  
83 the limited capability to identify viable pathogens (6). False positive results are a major issue for  
84 DNA-based approaches. This is due to the inability to differentiate DNA molecules in viable  
85 bacterial cells from the genomic background, which is comprised of stable DNA molecules from  
86 the microbiota, the food matrices, and dead pathogens inactivated during food processing and  
87 storage (7, 8). In contrast, transcriptome-based technologies which utilize RNA as alternative  
88 biomarkers for bacterial viability hold more promise, because RNA molecules tend to have a  
89 shorter half-life than DNA in the environment when cells are inactivated (7, 8). Recent progress  
90 was made using reverse transcription PCR (RT-PCR), but false positives also plague RT-PCR  
91 approaches (9). This can be explained by non-specific amplification of RNA molecules from food  
92 matrices and microbiota (10, 11). Subsequent sequencing of the RT-PCR amplicons has the  
93 potential to significantly improve the accuracy of the transcriptome-based approach by identifying  
94 the origin of the amplicons. The second prominent challenge is multiplex identification without  
95 the need for assay customization to each individual microbial threat. Each food commodity often  
96 faces multiple, and sometimes random, threats from dozens of major etiological agents (12). A

97 monitoring and inspection system should entail capacities of multiplex identification. Nonetheless,  
98 conventional systems depend on the customization of recognition elements, like antibodies or  
99 enzymes, to achieve multiplex detection, which can be self-prohibitory economically (13, 14).  
100 Therefore, a feasible strategy should enable multiplex identification without the need to customize  
101 for individual threats, which can be of great importance and benefit to food defense. Several  
102 multiplex RT-PCR methods were developed for *S. aureus*, *Salmonella* and *Listeria* using food  
103 models over the last decade (15-20). However, a recent validation study suggests that multiplex  
104 RT-PCR may also generate false positive results in real food samples, especially if rRNA is the  
105 target template (11). Very recently, Next Generation Sequencing (NGS) platforms, such as  
106 Illumina, have emerged as a new strategy for food defense (21-25) but , its applications in food  
107 testing are very limited. NGS does not permit timely analysis, as these platforms generate  
108 sequence reads in parallel and not in series, so data analysis can add significant burden to total  
109 turnaround time. Additionally, NGS relies on non-portable and expensive equipment, which is  
110 also economically self-prohibitory for the food industry. The novel Oxford Nanopore MinION  
111 sequencer has emerged as a promising method of food pathogen detection based on its rapid, cost  
112 effective, portable, and high-throughput RNA and DNA sequencing workflows (26-29). Nanopore  
113 sequencing is a third-generation sequencing platform that can produce long reads on DNA and  
114 RNA molecules and perform real-time metagenomic and metatranscriptomic sequence analysis on  
115 the pocket-sized Nanopore MinION device (30). This technology can be used to identify viral  
116 pathogens, as well as microorganisms such bacteria and fungi (31-33). A few studies have  
117 demonstrated Nanopore's potential for food safety application using metagenomic sequencing in  
118 clinical and food samples (34), however, like other genomic approaches, stable DNA molecules  
119 can cause false-positive identification, but the studies did not include a validation of whether the

120 nanopore metagenomic sequencing data only correlates with viable pathogens. Direct RNA  
121 sequencing on Nanopore was successfully developed in 2018 on the Nanopore MinION (30).

122

123 Therefore, for the first time, RNA-enabled Nanopore sequencing is evaluated for its potential in  
124 achieving multiplex identification of viable pathogens in this study (Fig 1). Specifically, an  
125 optimized universal RNA extraction and DNA digestion method is developed to simplify and  
126 standardize the RNA preparation for both Gram-positive and Gram-negative bacteria. Direct  
127 metatranscriptomic RNA sequencing and multiplex RT-PCR amplicon sequencing were evaluated  
128 and compared using a cocktail culture of *Escherichia coli* O157:H7 (*E. coli* O157:H7), *Salmonella*  
129 *enteritidis* (*S. enteritidis*), and *Listeria monocytogenes* (*L. monocytogenes*) in both standard  
130 general-purpose media and food model. The three bacteria were selected based on their impact on  
131 economic loss or prevalence in recent outbreaks.

132

## 133 **Materials and methods**

### 134 **Bacterial strains and culturing**

135 *E. coli* O157:H7 (ATCC 43895), *S. enteritidis* (ATCC 13076), and *L. monocytogenes* (ATCC  
136 19115) were acquired from ATCC (Manassas, VA). The three bacteria were cultured using Brain  
137 Heart Infusion (BHI) broth and agar (BD, Franklin Lakes, NJ) at 37°C for 24 hours either in  
138 separate individual cultures or in cocktail cultures. Romaine lettuce (*Lactuca sativa* L. var.  
139 *longifolia*) juice extract (LJE) was used as a food model in this study. Romaine LJE was prepared  
140 according to our previous publications (35). Briefly, 250g fresh Romaine lettuce heart (Fresh  
141 Express) and 200ml DI Water was blended in a Waring 7011G Commercial Blender for 1 minute.  
142 The blended mixture was then filtered through Büchner funnel with P5 filter paper. The filtrate

143 was centrifuged at 4500 rpm for 10 minutes (low speed centrifugation), the supernatant from low  
144 speed centrifugation was then centrifuged at 6500 rpm for 30 min (high speed centrifugation).  
145 High speed centrifugation supernatant was then filtered through 0.2 micro filter membrane  
146 (vacuum filter 0.2-micron, Fisher Scientific) and diluted to 4% using sterilized DI water (COD=  
147 800 ppm) to grow bacteria.

148

149 Cocktail culture of *E. coli* O157:H7, *S. enteritidis*, and *L. monocytogenes* in Brain Heart Infusion  
150 (BHI) or LJE were obtained by inoculating appropriate volume of 24-hour stock culture of the  
151 individual bacteria to achieve the initial concentration shown in S2 Table. The concentration for  
152 each bacteria was determined by plate counting methods using selective agars. Oxford *Listeria*  
153 selective agar base (Oxford formulation) with Oxford modified *Listeria* selective supplement was  
154 used for the selective quantification of *L. monocytogenes*. MacConkey agar (BD, Franklin Lakes,  
155 NJ) was used to differentiate and quantify *E. coli* O157:H7 and *S. enteritidis*. Both cultures were  
156 incubated at 37°C for 24 hours before quantification using an automated plate counter (Scan 300,  
157 Interscience Laboratories Inc., Woburn, MA).

158

### 159 **Verification of mRNA as biomarkers for bacteria viability**

160 *E. coli* O157:H7 was selected as a model organism to demonstrate that mRNA is a valid indicator  
161 for bacteria viability. Aliquot of overnight *E. coli* O157:H7 culture was inoculated at 3-log  
162 CFU/mL in BHI broth and incubated at 37 °C. Culture was sampled at 0, 4, 8, 24 and 72 hours,  
163 fractions from the sample culture were taken and plated on BHI agar to determine viable bacteria  
164 counts. Remaining fractions were used for DNA and RNA purification using DNeasy blood and  
165 tissue kit (Qiagen, Germantown, MD) and Monarch Total RNA Miniprep Kit (New England



166 Biolabs, Ipswich, MA) following the supplier protocols, respectively. In RNA preparation, to lyse  
167 the cells, the cell pellet obtained from initial centrifugation was incubated at 37°C for 1 hour with  
168 300 rpm mixing in 250 µL 3 mg/mL lysozyme (Alfa Aesar, Haverhill, MA) in Tris-EDTA buffer  
169 (Sigma-Aldrich, St. Louis, MO). Purified DNA and RNA from these four time points were  
170 quantified using Qubit dsDNA HS Assay Kit and Qubit RNA HS Assay Kit (Invitrogen, Carlsbad,  
171 CA), and also quantified using NEB Luna Universal qPCR Master Mix and Luna Universal One-  
172 Step RT-qPCR Kit (New England Biolabs, Ipswich, MA) for qPCR and RT-qPCR test, following  
173 supplier protocols, with Biorad CFX-96 Touch real time PCR detection system. The primer pairs  
174 used in this test were designated as Stx1A and sequence was listed in S3 Table. *E. coli* O157:H7  
175 inactivated with 13.4 mmol/L of sodium hypochlorite was used as the negative control to test  
176 whether mRNA and/or DNA can be used as viability biomarkers (36).

177

### 178 **Direct metatranscriptome RNA-seq on Nanopore MinION**

179 One dimensional direct metatranscriptome RNA-seq was performed using 24-hour cocktail culture  
180 of *E. coli* O157:H7, *S. enteritidis*, and *L. monocytogenes* in BHI or LJE. RNA was extracted from  
181 the cocktail culture by Monarch Total RNA Miniprep Kit including DNase I (NEB, Ipswich, MA)  
182 which was confirmed by multiplex RT-PCR and gel electrophoresis. DNA was completely digested  
183 using DNase I (NEB # T2010S, working concentration: 0.1U/µl), which was verified by multiplex  
184 PCR and gel electrophoresis. The primers stx, invA and LisA2 were selected for *E. coli* O157:H7,  
185 *S. enteritidis*, and *L. monocytogenes*, respectively. RT-PCR products were analyzed using gel  
186 electrophoresis with 1.2% agarose gel. NEB One Taq One-Step RT-PCR Kit (NEB # E5310S) was  
187 used for nucleic acid amplification. The thermal cycler condition was: 1. Reverse transcription at  
188 48°C for 15 minutes; 2. Initial denaturation at 94°C for 1 minute; 3. Denaturation at 94°C for 15

189 sec, annealing at 53°C for 30 sec, extension at 68°C for 40 sec with 40 cycles; 4. Final extension  
190 at 68°C for 5 minutes.

191  
192 The prepared RNA samples were further modified with poly(A) tailing and library preparation by  
193 following suppliers' protocols. Direct metatranscriptome RNA-seq was developed based on  
194 supplier's direct RNA-seq protocol (RNA Kit SQK-RNA001, Nanopore, Oxford, United  
195 Kingdom). The MinION flow cell was primed using a priming mix, and then 75 µl of sample was  
196 loaded to the SpotON sample port dropwise to avoid bubbles. After adding the sample, MinKNOW  
197 software was initiated to start a sequencing run. Cocktail culture inactivated with 13.4 mmol/L of  
198 sodium hypochlorite was used as the negative control to test whether metatranscriptome  
199 sequencing can eliminate false positive identification.

200

### 201 **Multiplex RT-PCR amplicon sequencing on Nanopore MinION**

202 Multiplex RT-PCR amplicon sequencing was conducted using 4-hour cocktail culture of *E. coli*  
203 O157:H7, *S. enteritidis*, and *L. monocytogenes* in BHI or LJE. RNA extraction and DNA digestion  
204 were performed and verified using the same protocols listed above. Major virulent genes selected  
205 in this study include: *stx* and *stx1A* localized to the lambdoid prophages H19B and H19J in *E. coli*  
206 O157:H7 (37-39); *invA*, a critical component of the *Salmonella* pathogenicity island 1 (SPI1) in *S.*  
207 *enteritidis* (39, 40); and *inlA*, encoded internalins genes in the *inlAB* operon outside the  
208 *Listeria* pathogenicity island 1 (LIPI-1) in *L. monocytogenes* (39, 41, 42).

209

210 Prior to RT-PCR amplicon sequencing, an end repair/A tailing step (NEBNext End Repair/dA-  
211 tailing Module) was carried out for the RT-PCR products, followed by a ligation step using NEB

212 Ultra II ligation master mix. Oxford Nanopore Ligation Sequencing Kit SQK-LSK108 and Library  
213 Loading Bead Kit EXP-LLB001 were used for the library preparation of RT-PCR amplicon. To  
214 validate Nanopore DNA sequencing results, the RT-PCR products were also sequenced using an  
215 Applied Biosystems 3130xl genetic analyzer by following a protocol at NEB. The DNA  
216 sequencing data collected by the sequencer was analyzed using EPI2ME and MG-RAST to  
217 confirm the identities of the three bacteria. Cocktail culture inactivated with 13.4 mmol/L of  
218 sodium hypochlorite was used as the negative control to test whether multiplex RT-PCR amplicon  
219 sequencing can eliminate false positive identification. Detailed protocols for RT-PCR are provided  
220 in the supplemental material.

221

## 222 **Data analysis and bioinformatics**

223 Sequencing reads were base-called via the local base-calling algorithm with MinKNOW software  
224 (v. 1.4.3). All FASTQ files of passed base-called reads were collected and combined to one file  
225 for analysis. EPI2ME, MG-RAST and MEGAN were used for metagenomics and taxonomic  
226 analysis.

227

## 228 **Results**

### 229 **Verification of mRNA as biomarkers for bacteria viability**

230 Fig 2 showed qPCR, RT-qPCR results of *E. coli* O157:H7 samples collected from 5 time points.  
231 *E. coli* O157:H7 growth curve (Fig 2A) resembles a typical microbial growth curve with an  
232 exponential phase from 0 to 24 hours and a stationary phase from 24 to 72 hours. Bacterial counts  
233 at 72 hours showed a slight decrease from 24 hours, which could indicate the start of death phase.  
234 The RT-qPCR of mRNA collected at different time points (Fig 2B) showed that the greatest

235 amount of RNA was found in 8-hour and 24-hour samples, followed by a decline of mRNA  
236 concentration at 72 hours. A high alignment between mRNA concentration and viable cell density  
237 can be established between Fig 2A and 2B. The results indicate mRNA has good correlation with  
238 viable bacterial count. The melt curve (Fig 2E) showed 5 peaks from the 5 different time points,  
239 which indicate that the same mRNA was amplified. In negative control, no colony was identified  
240 on BHI agar and no amplicon was detected by gel electrophoresis.

241  
242 The qPCR of *E. coli* O157:H7 DNA (Fig 2D) showed that the amount of DNA in 72-hour samples  
243 was greater than the amount in 24-hour samples, which contradicted the data from the viable  
244 bacterial counts. This indicated DNA accumulation from nonviable cells was present in 72-hour  
245 samples, which was consistent with other studies (43, 44). Hence, DNA was not a great indicator  
246 of bacteria viability. Additionally, the same qPCR amplicon was detected by gel electrophoresis  
247 in the negative control of sodium hypochlorite treated *E. coli* O157:H7. Therefore, the results  
248 demonstrate that the global transcriptome, especially mRNA, of bacteria could be a robust  
249 indicator of cell viability.

250

### 251 **Direct metatranscriptome RNA-seq on Nanopore MinION**

252 Table 1 showed the results of direct metatranscriptome RNA-seq of *E. coli* O157:H7, *S. enteritidis*  
253 and *L. monocytogenes* cocktail in BHI and LJE 24-hour culture using different bioinformatics  
254 pipelines. Both EPI2ME, MG-RAST, and MEGAN miss-identified the three pathogens as other  
255 species (Table 2). MEGAN with non-rRNA mapping successfully identified the three bacteria  
256 without miss-identification as *Listeria*, *E. coli* and *Salmonella* at 91.1%, 5.4% and 3.6% in BHI  
257 and 67.5%, 20% and 12.5% in LJE, respectively (Table 2). The results agreed with plate counting

258 confirmation that all three bacteria were present (S2 Table). The mean read-length was close to  
259 1,200 bp (Table 1 and S2 Fig.), which agrees with the size of 16S RNA in bacteria. The average  
260 quality scores were 7.8 in BHI and 7.9 in LJE. There was no miss-identification of the bacteria  
261 using a quality score cut-off at 7.0 using MEGAN analysis with non-rRNA mapping. No false  
262 positive identification of any bacteria was found in the negative control of sodium hypochlorite  
263 treated cocktail culture (negative control). Therefore, the results strongly support that direct  
264 metatranscriptome RNA-seq on Nanopore MinION can achieve multiplex identification of viable  
265 pathogens.

266

### 267 **Multiplex RT-PCR amplicon sequencing on Nanopore MinION**

268 Similarly, multiplex RT-PCR amplicon sequencing also successfully identified the three bacteria  
269 in the 4-hour cocktail culture sample (Fig 3). *E. coli* O157:H7, *S. enteritidis* and *L. monocytogenes*  
270 were observed in a real-time phylogenetic tree generated by EPI2ME in less than 15 minutes and  
271 the distribution was respectively 84.7%, 13.7% and 1.7% in BHI sample, and 50.9%, 43.4% and  
272 5.7% in LJE sample (Fig 3A, 4B and Table 2). The average read quality was 10.4 and 9.7. A total  
273 of 29,279 reads were analyzed in BHI culture with a 3-hour running time (early termination due  
274 to high quality score) and 442,325 reads in LJE cocktail culture with a 24-hour running time (Table  
275 1). The average sequence length was 534 bp in BHI sample and 432 bp in LJE sample (S3 Table  
276 and S2 Fig.) which was consistent with multiplex RT-PCR products (520, 244 and 153 bp) (39-  
277 42). No false positive identification of any bacteria was found in the negative control of sodium  
278 hypochlorite treated cocktail culture.

279

### 280 **Quality control and comparison of bioinformatic pipelines**

281 In this study, the quality score of direct metatranscriptome RNA-seq was 7.8 and 7.9, while 10.4  
282 and 9.7 for multiplex RT-PCR amplicon sequencing from MinKNOW QC report (Table 1). Raw  
283 data was collected by nanopore real-time sequencing software MinKNOW and analyzed with  
284 different bioinformatic databases and pipelines. In metatranscriptomic direct RNA-seq,  
285 MinKNOW miss-identified *Bacillus* as the top genus in both the BHI and LJE samples (Table 2).  
286 This error could be caused by the similarity between *Listeria* and *Bacillus*, especially with their  
287 housekeeping genes and rRNA (45, 46). Although MG-RAST eliminated this misreading, other  
288 untargeted bacteria counted for a close proportion to *S. enteritidis* (1.5%) (Table 2). MEGAN  
289 was able to eliminate other untargeted bacteria except *Bacillus* (still misidentified as 63.6%),  
290 which again was likely caused by rRNA or other housekeeping genes. Therefore, MEGAN with  
291 non-rRNA mapping was performed and successfully identified all three primary bacteria of  
292 *Listeria*, *E. coli* O157:H7 and *Salmonella* without any miss-identification (Table 2). The results  
293 of multiplex RT-PCR sequencing showed that three targeted bacteria were anchored accurately  
294 by MinKNOW (Table 2), and no miss-identification appeared in the results.

295

### 296 **Gel electrophoresis of RT-PCR and PCR amplicon**

297 RT-PCR was used to verify the presence of all three bacteria in the cocktail culture, and PCR  
298 was used to verify the complete removal of DNA contamination using the protocol described  
299 above.

300

301 S3A Fig. shows the verification of 24-hour LJE cocktail culture, which was used in  
302 metatranscriptomic direct RNA-seq. The results showed the RT-PCR product of three expected  
303 bands for *stx*, *invA* and *inlA* in the 24-hour cocktail culture, which confirms the presence of all

304 three target pathogens. No bands appeared on negative controls using only PCR without the RT  
305 step, which indicates the absence of DNA contamination. Further validation was performed for the  
306 4-hour LJE cocktail culture sample, which was used in the multiplex RT-PCR amplicon  
307 sequencing. S3B Fig. shows multiplex RT-PCR amplicon with three bands. The sizes of the  
308 amplicons are consistent with previous reports of 520 (*stx*), 244 (*invA*) and 153 (*inlA*) bp (S3B Fig.  
309 line 2). No RT-PCR products were detected in the negative control (line 3, 4 and 5) using only  
310 PCR without the RT step, which indicates that there was no DNA contamination in the sample.

311

### 312 **Discussion Viability and multiplex identification**

313 In this study, RNA-enabled Nanopore sequencing is evaluated, for the first time, for its potential  
314 in achieving multiplex identification of viable pathogens. The optimized universal RNA extraction  
315 and DNA digestion method was developed to simplify and standardize the RNA preparation for  
316 both Gram-positive and Gram-negative bacteria. Direct metatranscriptome RNA-seq and  
317 multiplex RT-PCR amplicon sequencing were evaluated and compared using a cocktail culture of  
318 *E. coli* O157:H7, *S. enteritidis*, and *L. monocytogenes* in both standard general-purpose media and  
319 food model. False positives are a major issue for DNA-based approaches. This is due to the  
320 inability to differentiate DNA molecules in viable bacterial cells from the genomic background,  
321 which is comprised of stable DNA molecules from the microbiota, the food matrices, and dead  
322 pathogens inactivated during food processing and storage. Both approaches developed in this study  
323 only utilize RNA, especially mRNA, as the ultimate sequencing target, which eliminated false  
324 positive identification typically caused by DNA contamination. Random and unknown threats  
325 from multiple infectious bacteria poses significant threat to the safety and security of food supply  
326 worldwide. A feasible strategy should enable multiplex identification without the need to

327 customize for an individual threat. Therefore, the developed universal protocol is applicable to  
328 both Gram-positive and Gram-negative bacteria. RNA from multiple pathogens in one food sample  
329 can be collected from one extraction and library preparation step, followed by the universal  
330 sequencing protocol.

331

### 332 **Comparison of direct metatranscriptome RNA-seq and multiplex RT-PCR amplicon** 333 **sequencing**

334 The developed method successfully identified all three bacteria from cocktail culture in BHI and  
335 LJE by direct metatranscriptome RNA-seq and multiplex RT-PCR amplicon sequencing.  
336 Nonetheless, the two sequencing approaches entail different capacities and challenges. Direct  
337 metatranscriptome RNA-seq does not require assay customization for an individual biohazard if  
338 the bioinformatic database includes the target microbiota. Multiplex RT-PCR amplicons comprise  
339 the target gene copies, and they can be easily captured by the motor membrane protein when  
340 passing through the nanopores. As a result, it shows higher accuracy, greater quality score, better  
341 quality control, and less turnaround time. The two strategies result in different read length. In this  
342 study, we extracted total bacterial RNA that is comprised of a majority of rRNA and a small  
343 number of mRNA and tRNA for nanopore sequencing. The bioanalyzer results showed that a  
344 majority of RNA from *E. coli* O157:H7, *S. enteritidis* and *L. monocytogenes* cocktail culture were  
345 16S RNA with 1250 – 2100 nt, and 23S RNA with 2250 – 3950 nt, respectively. Direct  
346 metatranscriptome RNA-seq sequencing successfully identified all three bacteria. The RNA read  
347 length ranged from 0 to 3000 nt, with the most abundant read length between 400-1600 nt. The  
348 read length from direct metatranscriptome RNA-seq is approximately the full length of RNA (47,  
349 48). Thus, this method can provide approximal full-length RNA sequence. However, in multiplex



350 RT-PCR amplicon sequencing, the amplicons for each bacteria have different expected sizes,  
351 which were observed in the sequencing read length results. In the real-time analysis of multiplex  
352 RT-PCR amplicon sequencing, all three bacteria were identified within 15 minutes and the  
353 resulting read lengths were 510 bp (*stx*), 244 bp (*invA*) and 153 bp (*inlA*), respectively. Some  
354 reports suggest that Nanopore excels in long RNA reads up to thousands of nt, and sequencing of  
355 short reads tends to be more challenging due to their higher and non-uniform error profiles, which  
356 might result in a large fraction of reads remaining unmapped or unused (49-51). However,  
357 amplicon sequencing showed less error than metatranscriptomic direct RNA-seq. Multiplex RT-  
358 PCR amplicon sequencing successfully identified all three target bacteria using MinKNOW (Table  
359 2) in real time. Direct metatranscriptome RNA-seq experienced miss-identification if selecting the  
360 wrong bioinformatic databases or pipelines. Both methods are comparable in their total turnaround  
361 time. Direct metatranscriptome RNA-seq does not include an additional RT-PCR step, but the  
362 library preparation, bioinformatic analysis, and mapping could easily offset the time difference.  
363 The total turnaround time for direct metatranscriptome RNA-seq is approximately 6.5 hours,  
364 which includes RNA purification (3.5 hours), library preparation (1.5 hours), Nanopore  
365 sequencing (1 hour), and bioinformatic analysis (0.5 hour). Multiplex amplicon sequencing takes  
366 approximately 6 hours, which includes RNA purification (3.5 hours), RT-PCR (2 hours), library  
367 preparation (0.5 hour), Nanopore sequencing (15 minutes), and bioinformatics analysis (0.5 hour).  
368  
369 Multiplex RT-PCR amplicon sequencing requires substantially less RNA input, which could  
370 translate into less microbial input. The method only requires 36.5 ng RNA input for multiplex RT-  
371 PCR, and 33.8 ng amplicon for library preparation and sequencing (S2 Table). The amplicon  
372 sequencing method is more sensitive and could be applicable for food commodities with low

373 bacterial loading around  $10^1$ - $10^4$  CFU/g. 500 ng RNA input on Nanopore MinION is  
374 recommended by the supplier for metatranscriptomic direct RNA-seq. However, significant RNA  
375 loss was observed during the library preparation due to the three purification steps. The initial  
376 purified RNA concentration before library preparation was 3490 ng and 1338 ng in BHI and LJE  
377 respectively, and only 744 ng and 130 ng were yielded for Nanopore sequencing. RNA loss can  
378 be as high as 80-90%, which significantly restricted sensitivity of the assay. Redesign of the library  
379 preparation protocol to minimize RNA loss can have profound significance for assay sensitivity  
380 and feasibility for clinical applications. The two strategies pose different levels of complexities.  
381 Direct metatranscriptome RNA-seq may be applicable in foods with a complex microbiome (e.g.,  
382 cultured food). Direct metatranscriptome RNA-seq does not require assay customization for an  
383 individual biohazard, if the bioinformatic database includes the target microbiota. The multiplex  
384 RT-PCR amplicon sequencing requires complex primer design and validation. Not all RT-PCR  
385 primers work in multiplex RT-PCR, due to potential primer interaction, nonspecific amplification,  
386 and amplification bias. The amplicon sequencing may be more suitable for high-throughput and  
387 continuous monitoring of foodborne pathogens with high risk factors.

388

### 389 **Comparison between different bioinformatic pipelines**

390 Bioinformatic analysis has significant impact to the accuracy of Nanopore sequencing. Different  
391 computational pipelines of the same nanopore data may lead to different results. Normally,  
392 MinION pipeline contains primer trimming, alignment, variant calling and consensus generation  
393 (52-55), and EPI2ME conducts real-time surveillance of nanopore sequencing. First, reads  
394 containing raw data are base called by MinKNOW, and then extracted into a FASTQ file for  
395 mapping to reference transcriptome or genome (56-58), aligned to sequence via primer trimming

396 and coverage normalization. During this process, low quality or low coverage reads (read hit) are  
397 filtered out to generate final sequence for BLAST in NCBI. MinION chemistry provides a  
398 simplified and rapid report of nanopore running, including read number, read length, cumulative  
399 read, taxonomy tree and quality control. MEGAN and MG-RAST are popular software or  
400 service for metagenome or metatranscriptome analysis. The similarity between them is that they  
401 perform computational analysis of multiple datasets for taxonomic content based on family and  
402 gene level. In contrast, MEGAN is able to perform taxonomical, functional and interactive  
403 analyses, which is the comparison of taxonomic and functional contents based on the SEED  
404 hierarchy and KEGG pathways (59, 60). In this study, MG-RAST was used in taxonomic  
405 analysis, and MEGAN was selected for mRNA analysis in addition to MinION. Both show a  
406 higher accuracy compared with MinION for metatranscriptome sequencing. Multiplex RT-PCR  
407 amplicon obtained a rapid and accurate taxonomic content because this nanopore sequencing  
408 method poses a high sensitivity. In addition, adequate and complete BLAST database may  
409 further improve the accuracy, rapidness, and quality for the multiplex identification of viable  
410 pathogens in food. In conclusion, novel strategies are developed through direct  
411 metatranscriptome RNA-seq and multiplex RT-PCR amplicon sequencing on Nanopore MinION  
412 to achieve real-time multiplex identification of viable pathogens in food. This study reports an  
413 optimized universal Nanopore sample extraction and library preparation protocol applicable to  
414 both Gram-positive and Gram-negative. Further evaluation and validation confirmed the  
415 accuracy of direct metatranscriptome RNA-seq and multiplex RT-PCR amplicon sequencing  
416 using Sanger sequencing and selective media. The study also included a comparison of different  
417 bioinformatic pipelines for metatranscriptomic and amplicon genomic analysis. In addition,  
418 direct metatranscriptome RNA-seq and RT-PCR amplicon sequencing were compared for their

419 respective advantages in sample inputs, accuracy, sensitivity, and time effectiveness for potential  
420 applications. Both direct metatranscriptome RNA-seq and multiplex RT-PCR amplicon  
421 sequencing need more development to address some pressing challenges. A) Optimization of  
422 direct metatranscriptome RNA-seq sequencing may include minimizing RNA loss in the library  
423 preparation step; comparison of bioinformatic pipelines to eliminate miss-identified and  
424 unclassified targets; cross-domain identification of prokaryotes, eukaryotes, and viruses. B)  
425 Multiplex RT-PCR amplicon sequencing can benefit from: multiplex primer development;  
426 inclusivity/exclusivity evaluations; reduced amplification bias. To the best of our knowledge,  
427 this is the first report of metatranscriptome sequencing of cocktail microbial RNAs on the  
428 emerging Nanopore platform. Direct RNA-seq and RT-PCR amplicons sequencing of  
429 metatranscriptome enable the direct identification of nucleotide analogs in RNAs, which is  
430 highly informative for determining microbial identities while detecting ecologically relevant  
431 processes. The information pertained in this study could be important for future revelatory  
432 research including predicting antibiotic resistance, elucidating host-pathogen interaction,  
433 prognosing disease progression, and investigating microbial ecology, etc.

434

#### 435 **Acknowledgments**

436 The project is partially supported by the U.S. Department of Agriculture (S51600000035794).  
437 Special appreciation goes to LiTing Chiu and Tong Wu for their support in this project.

438 **Table 1. Direct metatranscriptome RNA-seq and amplicon sequencing of cocktail bacterial**  
 439 **culture on Nanopore platform.**

| Sequencing                       | Sample  | Flow cell chemistry   | Running time (h) | Total yield (Mbases) | Reads analyzed | Passed reads | Failed reads | Mean read-length (bp) | Mean quality score |
|----------------------------------|---------|-----------------------|------------------|----------------------|----------------|--------------|--------------|-----------------------|--------------------|
| Direct metatranscriptome RNA-seq | BHI-24h | FLO-MIN106 R9.4 Rev D | 16               | 467.7                | 412,000        | 409,744      | 2,256        | 1,135                 | 7.8                |
|                                  | LJE-24h | FLO-MIN106 R9.4 Rev D | 19               | 223.1                | 180,962        | 180,001      | 961          | 1,233                 | 7.9                |
| RT-PCR amplicon                  | BHI-4h  | FLO-MIN106 R9.4 Rev D | 3                | 15.6                 | 29,290         | 29,279       | 11           | 534                   | 10.4               |
|                                  | LJE-4h  | FLO-MIN106 R9.4 Rev D | 24               | 200.2                | 442,647        | 442,325      | 322          | 452                   | 9.7                |

440

441

442 **Table 2. Results of MinION R9.4 Rev D direct metatranscriptome RNA-seq and RT-PCR**  
 443 **amplicon sequencing for BHI and LJE samples collected from 4-hour and 24-hour culture**  
 444 **with different initial growth concentration via different bioinformatic pipelines. \***

| Sequencing                       | Sample  | Bioinformatic pipeline    |                      |                        |                  |                    |            |                           |              |
|----------------------------------|---------|---------------------------|----------------------|------------------------|------------------|--------------------|------------|---------------------------|--------------|
|                                  |         | MinKNOW/EPI2ME            |                      | MG-RAST                |                  | MEGAN              |            | MEGAN-rRNA excluded       |              |
|                                  |         | Taxon                     | Cumulative reads     | Taxon                  | Cumulative reads | Taxon              | Percentage | Taxon                     | Percentage   |
| Direct metatranscriptome RNA-seq | BHI-24h | <i>Bacillus</i>           | 65,746 (37.6%)       | <i>Listeria</i>        | 75,562 (85.28%)  | <i>Bacillus</i>    | 63.6%      | <b><i>Listeria</i></b>    | <b>91.1%</b> |
|                                  |         | <i>Listeria</i>           | 54140 (31.0%)        | <i>Escherichia</i>     | 4,560 (5.15%)    | <i>Listeria</i>    | 29.5%      | <b><i>Escherichia</i></b> | <b>5.4%</b>  |
|                                  |         | <i>Escherichia</i>        | 29312 (16.8%)        | <i>Salmonella</i>      | 1,281 (1.45%)    | <i>Escherichia</i> | 4.5%       | <b><i>Salmonella</i></b>  | <b>3.6%</b>  |
|                                  |         | <i>Lactobacillus</i>      | 10718 (6.1%)         | <i>Coptotermes</i>     | 1,237 (1.40%)    | <i>Salmonella</i>  | 2.3%       | -                         | -            |
|                                  |         | <i>Staphylococcus</i>     | 8772 (5.0%)          | <i>Bacillus</i>        | 952 (1.07%)      | -                  | -          | -                         | -            |
|                                  |         | <i>Salmonella</i>         | 6155 (3.5%)          | <i>Tetragenococcus</i> | 435 (0.49%)      | -                  | -          | -                         | -            |
|                                  | LJE-24h | <i>Bacillus</i>           | 25434 (34.5%)        | <i>Listeria</i>        | 66,776 (76.55%)  | <i>Bacillus</i>    | 63.6%      | <b><i>Listeria</i></b>    | <b>67.5%</b> |
|                                  |         | <i>Escherichia</i>        | 23084 (31.3%)        | <i>Escherichia</i>     | 9,287 (10.65%)   | <i>Listeria</i>    | 29.5%      | <b><i>Escherichia</i></b> | <b>20.0%</b> |
|                                  |         | <i>Listeria</i>           | 16751 (22.7%)        | <i>Salmonella</i>      | 1,849 (2.12%)    | <i>Escherichia</i> | 4.5%       | <b><i>Salmonella</i></b>  | <b>12.5%</b> |
|                                  |         | <i>Salmonella</i>         | 4943 (6.7%)          | <i>Bacillus</i>        | 1,028 (1.18%)    | <i>Salmonella</i>  | 2.3%       | -                         | -            |
|                                  |         | <i>Edwardsiella</i>       | 3515 (4.8%)          | <i>Lactobacillus</i>   | 728 (0.83%)      | -                  | -          | -                         | -            |
|                                  |         | -                         | -                    | -                      | -                | -                  | -          | -                         | -            |
| RT-PCR amplicon                  | BHI-4h  | <b><i>Escherichia</i></b> | <b>5770 (84.7%)</b>  | <i>Escherichia</i>     | 1,342 (70.19%)   | -                  | -          | -                         | -            |
|                                  |         | <b><i>Salmonella</i></b>  | <b>931 (13.7%)</b>   | <i>Salmonella</i>      | 474 (24.79%)     | -                  | -          | -                         | -            |
|                                  |         | <i>Listeria</i>           | 113 (1.7%)           | <i>Enterobacter</i>    | 43 (2.25%)       | -                  | -          | -                         | -            |
|                                  |         | -                         | -                    | <i>Listeria</i>        | 20 (1.05%)       | -                  | -          | -                         | -            |
|                                  | LJE-4h  | <b><i>Escherichia</i></b> | <b>77437 (50.9%)</b> | <i>Escherichia</i>     | 1,852 (88.11%)   | -                  | -          | -                         | -            |
|                                  |         | <b><i>Salmonella</i></b>  | <b>66098 (43.4%)</b> | <i>Listeria</i>        | 179 (8.52%)      | -                  | -          | -                         | -            |
|                                  |         | <i>Listeria</i>           | 8711 (5.7%)          | <i>Enterobacter</i>    | 45 (2.14%)       | -                  | -          | -                         | -            |
|                                  |         | -                         | -                    | -                      | -                | -                  | -          | -                         | -            |

445

446 \* Bold indicates the optimal bioinformatics pipeline without miss-identification.

447 **References**

- 448  
449 1. Centers for Disease Control and Prevention (2018) Surveillance for foodborne disease  
450 Outbreaks, United States, 2016, Annual Report.  
451  
452 2. S. Hoffmann, B. Macculloch, M. Batz (2015) Economic burden of major foodborne illnesses  
453 acquired in the United States. in *Economic burden of major foodborne illnesses acquired*  
454 *in the United States* (United States Department of Agriculture, Economic Research  
455 Service), 59.  
456  
457 3. M. Heiat, R. Ranjbar, S. M. Alavian (2014) Classical and modern approaches used for viral  
458 hepatitis diagnosis. *Hepat Mon* **14**, e17632.  
459  
460 4. C. Baschien, W. Manz, T. R. Neu, L. Marvanova, U. Szewzyk (2008) *In situ* detection of  
461 freshwater fungi in an alpine stream by new taxon-specific fluorescence in situ  
462 hybridization probes. *Appl Environ Microbiol* **74**, 6427-6436.  
463  
464 5. L. M. Zanolli, G. Spoto (2013) Isothermal amplification methods for the detection of  
465 nucleic acids in microfluidic devices. *Biosensors* **3**, 18-43.  
466  
467 6. S. Malhotra, S. Sharma, N. Bhatia, P. Kumar, C. Hans (2014) Molecular methods in  
468 microbiology and their clinical application. *Journal of Molecular and Genetic Medicine* **8**.  
469  
470 7. T. J. Hellyer, L. E. DesJardin, G. L. Hehman, M. D. Cave, K. D. Eisenach (1999)  
471 Quantitative analysis of mRNA as a marker for viability of *Mycobacterium tuberculosis*. *J*  
472 *Clin Microbiol* **37**, 290-295.  
473  
474 8. G. E. Sheridan, C. I. Masters, J. A. Shallcross, B. M. MacKey (1998) Detection of mRNA  
475 by reverse transcription-PCR as an indicator of viability in *Escherichia coli* cells. *Appl*  
476 *Environ Microbiol* **64**, 1313-1318.  
477  
478 9. H. Lu, Y. Tang, L. Lin, D. R. Wolfgang (2016) Next-generation sequencing confirmation  
479 of real-time RT-PCR false positive influenza-A virus detection in waterfowl and swine  
480 swab samples. *Journal of Next Generation Sequencing & Applications* **3**.  
481  
482 10. H. Takahashi *et al.* (2018) RNase H-assisted RNA-primed rolling circle amplification for  
483 targeted RNA sequence detection. *Scientific reports* **8**, 7770.  
484 11. W. Ju, A. L. Moyne, M. L. Marco (2016) RNA-based detection does not accurately  
485 enumerate living *Escherichia coli* O157:H7 cells on plants. *Front Microbiol* **7**, 223.  
486  
487 12. S. J. Crowe, B. E. Mahon, A. R. Vieira, L. H. Gould (2015) Vital signs: multistate  
488 foodborne outbreaks - United States, 2010-2014. *Morb Mortal Wkly Rep* **64**, 1221-1225.  
489  
490 13. F. Faggioli, M. Luigi, I. N. Boubourakas, "Viroid amplification methods: RT-PCR, real-  
491 time RT-PCR, and RT-LAMP" in Viroids and Satellites. (2017), chap. 36, pp. 381-391.

- 492  
493 14. D. Wang, T. Hinkley, J. Chen, J. N. Talbert, S. R. Nugen (2019) Phage based  
494 electrochemical detection of *Escherichia coli* in drinking water using affinity reporter  
495 probes. *Analyst* **144**, 1345-1352.  
496  
497 15. T. Ding *et al.* (2017) A multiplex RT-PCR assay for *S. aureus*, *L. monocytogenes*, and  
498 *Salmonella spp.* detection in raw milk with pre-enrichment. *Frontiers in Microbiology*  
499 10.3389/fmicb.2017.00989, 989.  
500  
501 16. S. Kawasaki *et al.* (2010) Multiplex real-time polymerase chain reaction assay for  
502 simultaneous detection and quantification of *Salmonella species*, *Listeria monocytogenes*,  
503 and *Escherichia coli* O157:H7 in ground pork samples. *Foodborne Pathogens and Disease*  
504 **7**, 549-554.  
505  
506 17. H.-F. Bao *et al.* (2008) A highly sensitive and specific multiplex RT-PCR to detect foot-  
507 and-mouth disease virus in tissue and food samples. *Archives of Virology* **153**, 205-209.  
508  
509 18. N. T. Salihah, M. M. Hossain, H. Lubis, M. U. Ahmed (2016) Trends and advances in food  
510 analysis by real-time polymerase chain reaction. *Journal of Food Science and Technology*  
511 **53**, 2196-2209.  
512  
513 19. O. Ruiz-Rueda, M. Soler, L. Calvó, J. L. García-Gil (2011) Multiplex real-time PCR for  
514 the simultaneous detection of *Salmonella spp.* and *Listeria monocytogenes* in food samples.  
515 *Food Analytical Methods* **4**, 131-138.  
516  
517 20. A. Garrido *et al.* (2013) A new multiplex real-time PCR developed method for *Salmonella*  
518 *spp.* and *Listeria monocytogenes* detection in food and environmental samples. *Food*  
519 *Control* **30**, 76-85.  
520  
521 21. J. Moran-Gilad (2017) Whole genome sequencing (WGS) for food-borne pathogen  
522 surveillance and control – taking the pulse. *Eurosurveillance* **22**, 30547.  
523  
524 22. L. Solieri, T. C. Dakal, P. Giudici (2013) Next-generation sequencing and its potential  
525 impact on food microbial genomics. *Annals of Microbiology* **63**, 21-37.  
526  
527 23. S. Diaz-Sanchez, I. Hanning, S. Pendleton, D. D’Souza (2013) Next-generation sequencing:  
528 the future of molecular genetics in poultry production and food safety. *Poultry science* **92**,  
529 562-572.  
530  
531 24. E. N. Taboada, M. R. Graham, J. A. Carriço, G. Van Domselaar (2017) Food safety in the  
532 age of next generation sequencing, bioinformatics, and open data access. *Frontiers in*  
533 *Microbiology*, 909.  
534  
535 25. B. Mayo *et al.* (2014) Impact of next generation sequencing techniques in food  
536 microbiology. *Current Genomics* **15**, 293-309.  
537

- 538 26. A. M. Walsh, F. Crispie, M. J. Claesson, P. D. Cotter (2017) Translating omics to food  
539 microbiology. *Annual Review of Food Science and Technology* **8**, 113-134.  
540
- 541 27. J.-Y. Hyeon *et al.* (2018) Quasimetagenomics-based and real-time-sequencing-aided  
542 detection and subtyping of *Salmonella enterica* from food samples. *Applied and*  
543 *Environmental Microbiology* **84**, e02340-02317.  
544
- 545 28. T. L. Taylor *et al.* (2019) Rapid, multiplexed, whole genome and plasmid sequencing of  
546 foodborne pathogens using long-read nanopore technology. *bioRxiv*.  
547
- 548 29. L. Pritchard, R. H. Glover, S. Humphris, J. G. Elphinstone, I. K. Toth (2016) Genomics  
549 and taxonomy in diagnostics for food security: soft-rotting enterobacterial plant pathogens.  
550 *Analytical Methods* **8**, 12-24.  
551
- 552 30. D. R. Garalde *et al.* (2018) Highly parallel direct RNA sequencing on an array of nanopores.  
553 *Nature Methods* **15**, 201.  
554
- 555 31. S. Juul *et al.* (2015) What's in my pot? Real-time species identification on the MinION™.  
556 *bioRxiv*.  
557
- 558 32. J. Cheng *et al.* (2018) Identification of pathogens in culture-negative infective endocarditis  
559 cases by metagenomic analysis. *Annals of Clinical Microbiology and Antimicrobials* **17**,  
560 43.
- 561 33. A. L. Greninger *et al.* (2015) Rapid metagenomic identification of viral pathogens in  
562 clinical samples by real-time nanopore sequencing analysis. *Genome medicine* **7**, 99.  
563
- 564 34. J. Quick *et al.* (2015) Rapid draft sequencing and real-time nanopore sequencing in a  
565 hospital outbreak of *Salmonella*. *Genome biology* **16**, 114.  
566
- 567 35. C. Shen *et al.* (2012) Enhanced inactivation of *Salmonella* and *Pseudomonas* biofilms on  
568 stainless steel by use of T-128, a fresh-produce washing aid, in chlorinated wash solutions.  
569 *Appl Environ Microbiol* **78**, 6789-6798.  
570
- 571 36. B. M. Skinner, A. T. Rogers, M. E. Jacob (2018) Susceptibility of *Escherichia coli*  
572 O157:H7 to disinfectants *in vitro* and in simulated footbaths amended with manure.  
573 *Foodborne Pathog Dis* **15**, 718-725.  
574
- 575 37. W.-L. Zhang *et al.* (2000) Molecular characteristics and epidemiological significance of  
576 shiga toxin-producing *Escherichia coli* O26 strains. *Journal of Clinical Microbiology* **38**,  
577 2134-2140.  
578
- 579 38. C. Toma *et al.* (2003) Multiplex PCR assay for identification of human diarrheagenic  
580 *Escherichia coli*. *J Clin Microbiol* **41**, 2669-2671.  
581
- 582 39. T. T. Nguyen, V. Van Giau, T. K. Vo (2016) Multiplex PCR for simultaneous identification  
583 of *E. coli* O157:H7, *Salmonella spp.* and *L. monocytogenes* in food. *3 Biotech* **6**, 205.



- 584  
585 40. A. W. van der Velden, S. W. Lindgren, M. J. Worley, F. Heffron (2000) *Salmonella*  
586 pathogenicity island 1-independent induction of apoptosis in infected macrophages by  
587 *Salmonella enterica* serotype typhimurium. *Infection and immunity* **68**, 5702-5709.  
588
- 589 41. J. A. Vázquez-Boland *et al.* (2001) *Listeria* pathogenesis and molecular virulence  
590 determinants. *Clinical Microbiology Reviews* **14**, 584-640.  
591
- 592 42. L. Xiao, L. Zhang, H. H. Wang (2012) Critical issues in detecting viable *Listeria*  
593 *monocytogenes* cells by real-time reverse transcriptase PCR. *Journal of food protection* **75**,  
594 512-517.  
595
- 596 43. P. Delgado-Viscogliosi, L. Solognac, J. M. Delattre (2009) Viability PCR, a culture-  
597 independent method for rapid and selective quantification of viable *Legionella*  
598 *pneumophila* cells in environmental water samples. *Appl Environ Microbiol* **75**, 3502-3512.  
599
- 600 44. M. del Mar Lleò, S. Pierobon, M. C. Tafi, C. Signoretto, P. Canepari (2000) mRNA  
601 detection by reverse transcription-PCR for monitoring viability over time in an  
602 *Enterococcus faecalis* viable but nonculturable population maintained in a laboratory  
603 microcosm. *Appl Environ Microbiol* **66**, 4564-4567.  
604
- 605 45. E. Borezee, T. Msadek, L. Durant, P. Berche (2000) Identification in *Listeria*  
606 *monocytogenes* of MecA, a homologue of the *Bacillus subtilis* competence regulatory  
607 protein. *Journal of Bacteriology* **182**, 5931-5934.  
608
- 609 46. A. Ferreira, M. Gray, M. Wiedmann, K. J. Boor (2004) Comparative genomic analysis of  
610 the sigB operon in *Listeria monocytogenes* and in other gram-positive bacteria. *Current*  
611 *Microbiology* **48**, 39-46.  
612
- 613 47. A. Byrne *et al.* (2017) Nanopore long-read RNAseq reveals widespread transcriptional  
614 variation among the surface receptors of individual B cells. *Nature communications* **8**,  
615 16027.  
616
- 617 48. H. Cho *et al.* (2014) High-resolution transcriptome analysis with long-read RNA  
618 sequencing. *PloS one* **9**.  
619
- 620 49. M. G. Grabherr *et al.* (2011) Full-length transcriptome assembly from RNA-Seq data  
621 without a reference genome. *Nature Biotechnology* **29**, 644.  
622
- 623 50. C. de Lannoy, D. de Ridder, J. Risse (2017) The long reads ahead: de novo genome  
624 assembly using the MinION. *F1000Research* **6**.  
625
- 626 51. M. A. Madoui *et al.* (2015) Genome assembly using Nanopore-guided long and error-free  
627 DNA reads. *BMC Genomics* **16**.  
628

- 629 52. N. J. Loman, A. R. Quinlan (2014) Poretools: a toolkit for analyzing nanopore sequence  
630 data. *Bioinformatics* **30**, 3399-3401.  
631
- 632 53. D. E. Wood, S. L. Salzberg (2014) Kraken: ultrafast metagenomic sequence classification  
633 using exact alignments. *Genome biology* **15**, R46.  
634
- 635 54. P. Menzel, K. L. Ng, A. Krogh (2016) Fast and sensitive taxonomic classification for  
636 metagenomics with Kaiju. *Nature communications* **7**.  
637
- 638 55. L. J. Kerkhof, K. P. Dillon, M. M. Häggblom, L. R. McGuinness (2017) Profiling bacterial  
639 communities by MinION sequencing of ribosomal operons. *Microbiome* **5**, 116.  
640
- 641 56. H. Li, R. Durbin (2010) Fast and accurate long-read alignment with Burrows-Wheeler  
642 transform. *Bioinformatics* **26**, 589-595.  
643
- 644 57. S. Mitsuhashi *et al.* (2017) A portable system for rapid bacterial composition analysis using  
645 a nanopore-based sequencer and laptop computer. *Scientific reports* **7**, 5657.  
646
- 647 58. F. J. Rang, W. P. Kloosterman, J. de Ridder (2018) From squiggle to basepair:  
648 computational approaches for improving nanopore sequencing read accuracy. *Genome*  
649 *biology* **19**, 90.  
650
- 651 59. J. Borthong *et al.* (2018) Comparison of database search methods for the detection of  
652 *Legionella pneumophila* in water samples using metagenomic analysis. *Front Microbiol* **9**.  
653
- 654 60. D. H. Huson *et al.* (2018) MEGAN-LR: new algorithms allow accurate binning and easy  
655 interactive exploration of metagenomic long reads and contigs. *Biology Direct* **13**.  
656  
657

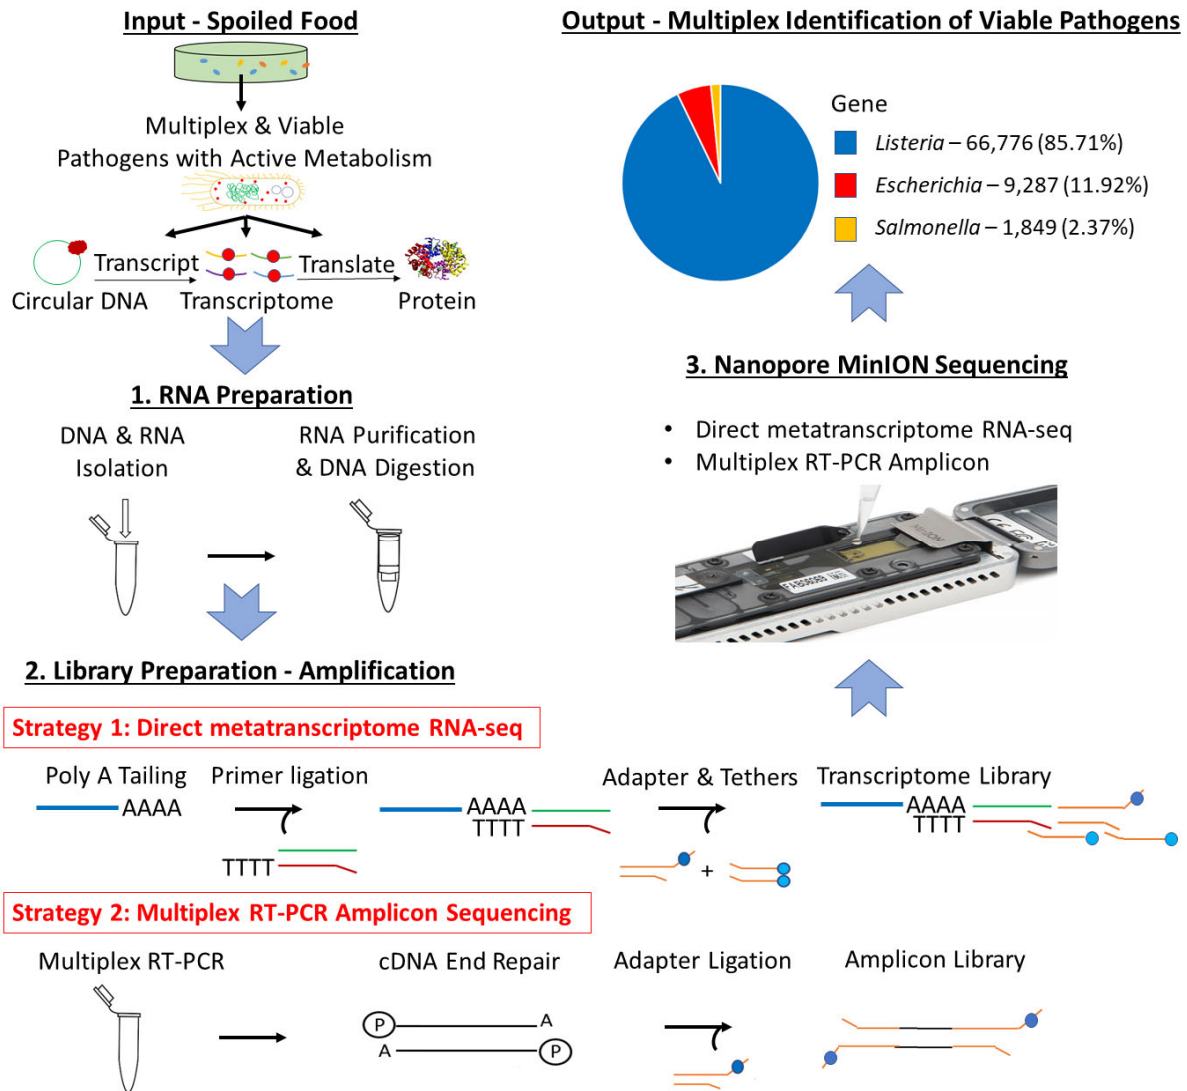

1

2 **Fig 1. Scheme of multiplex identification of viable pathogens on Nanopore MinION.**

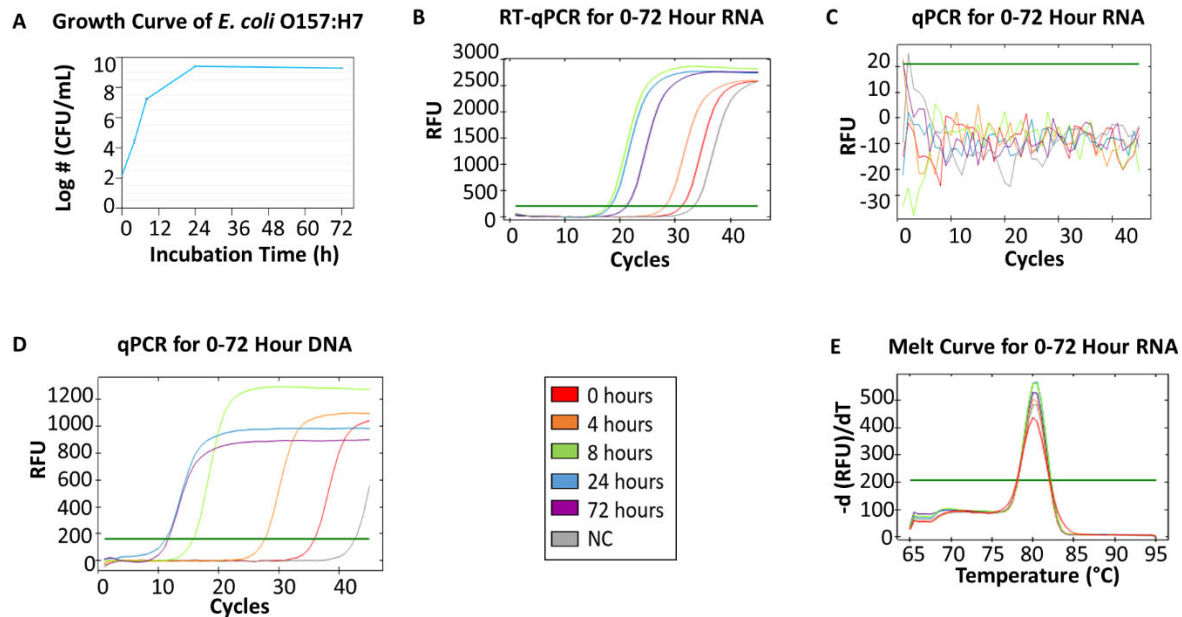

3

4 **Fig 2. RT-qPCR and qPCR of *E. coli* O157:H7 from 0, 4, 8, 24 and 72 h growth in BHI.** (A)

5 The growth curve of *E. coli* O157:H7 at 0, 4, 8, 24, 72 h in BHI. The initial concentration was 3-

6 log CFU/mL. (B) RT-qPCR for RNA collected from 5 time points. (C) qPCR for 0-72 h RNA as

7 the negative control (NC) for DNA contamination – no DNA contamination was found in those

8 samples. (D) qPCR for DNA collected from 5 time points. (E) The melting curve analysis of RT-

9 qPCR for 0-72 h RNA.

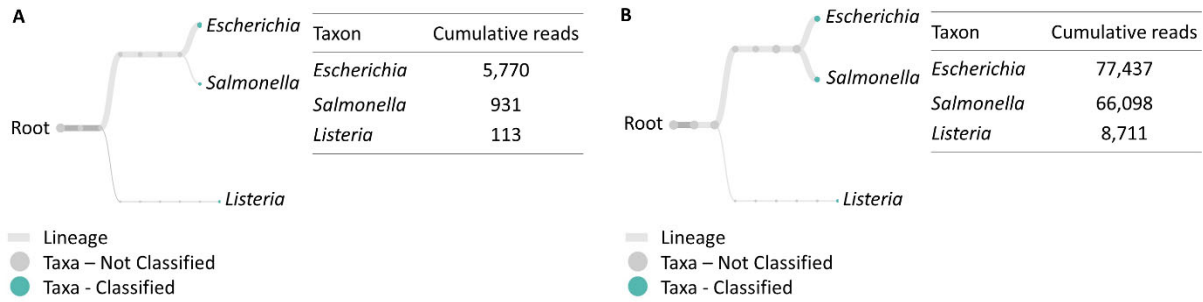

10

11 **Fig 3. Taxonomic and genus level bacterial classification of MinION R9.4 Rev D multiplex**

12 **RT-PCR amplicon sequencing.** (A) Taxonomy tree of BHI 334 4-hour sample generated by

13 EPI2ME. (B) Taxonomy tree of LJE 334 4-hour sample generated by EPI2ME.
