# Supplementary material for: Direct Metatranscriptome RNA-seq and Multiplex RT-PCR Amplicon Sequencing on Nanopore MinION – Promising Strategies for Multiplex Identification of Viable Pathogens in Food
Source: bioRxiv or medRxiv preprint supplement (doi:10.1101/700674), 2019-07-14
Supplement: Supplementary file [file media-1.pdf]

**Direct Metatranscriptome RNA-seq and Multiplex RT-PCR Amplicon Sequencing on Nanopore MinION – Promising Strategies for Multiplex Identification of Viable Pathogens in Food.**

**Author list**

Manyun Yang<sup>1\*</sup>, Alyssa Cousineau<sup>2\*†</sup>, Xiaobo Liu<sup>1\*†</sup>, Daniel Sun<sup>2,3</sup>, Shaohua Li<sup>2,4</sup>, Tingting Gu<sup>1</sup>, Luo Sun<sup>2</sup>, Yaguang Luo<sup>4</sup>, Mingqun Xu<sup>2#</sup>, Boce Zhang<sup>1#</sup>

<sup>1</sup>Department of Biomedical and Nutritional Sciences, University of Massachusetts, Lowell, MA 01854.

<sup>2</sup>New England Biolabs, Inc. Ipswich, MA 01938.

<sup>3</sup>Department of Chemistry, Brandeis University, Waltham, MA 02453.

<sup>4</sup>U.S. Food and Drug Administration, Silver Spring, MD 20993.

<sup>5</sup>Agricultural Research Service, U.S. Department of Agriculture, Beltsville, MD 20705.

\*These authors contributed equally.

# Boce Zhang: [boce\\_zhang@uml.edu](mailto:boce_zhang@uml.edu); Mingqun Xu: [xum@neb.com](mailto:xum@neb.com).

## Supplemental Materials

TABLE S1 Summary of conventional cultivation and commercial rapid detection methods.

| Method                           | Rapidness (hours)* | VBNC*                       | Portability* | Viability*                  | Multiplex w/o customization* |
|----------------------------------|--------------------|-----------------------------|--------------|-----------------------------|------------------------------|
| Most probable number             | <b>24–48</b>       | <b>No</b>                   | Yes          | Yes                         | Yes                          |
| Viable counts (e.g., Petrifilm™) | <b>24–72</b>       | <b>No</b>                   | Yes          | Yes                         | Yes                          |
| Lateral flow                     | <1                 | <b>No</b>                   | Yes          | <b>No</b>                   | <b>No</b>                    |
| DEFT/SPC                         | <1                 | <b>No</b>                   | <b>No</b>    | <b>No</b>                   | <b>No</b>                    |
| Immunoassay                      | 1–4                | <b>Enrichment required</b>  | Yes          | <b>Enrichment required</b>  | <b>No</b>                    |
| Flow cytometry                   | <1                 | Yes                         | <b>No</b>    | Yes                         | <b>No</b>                    |
| MALDI-TOF                        | 1                  | <b>No</b>                   | <b>No</b>    | Yes                         | Yes                          |
| DNA gene / PCR                   | ~4                 | <b>Yes / False positive</b> | Yes          | <b>No / False positive</b>  | <b>No</b>                    |
| RNA transcript / RT-PCR          | ~4                 | <b>Yes / False positive</b> | Yes          | <b>Yes / False positive</b> | <b>No</b>                    |
| Next generation sequencing (NGS) | 1–4                | Yes                         | <b>No</b>    | Yes                         | Yes                          |
| <b>Nanopore</b>                  | <b>1–4</b>         | <b>Yes</b>                  | <b>Yes</b>   | <b>Yes</b>                  | <b>Yes</b>                   |

\* Bold indicates major limitations.

TABLE S2 Nanopore sequencing input amount of RNA and RT-PCR amplicon (cDNA). CFU number was measured by plating count and nucleotide concentration was tested by Qubit assay. *Ec*, *Se* and *Lm* indicated *E. coli* O157:H7, *S. enteritidis* and *L. monocytogenes*, respectively. The bacteria culture condition was 37°C incubation.

| Sequencing<br>Sample                                                 | Direct metatranscriptome RNA-seq |           |           |             |           |           | RT-PCR amplicon               |           |           |            |           |           |
|----------------------------------------------------------------------|----------------------------------|-----------|-----------|-------------|-----------|-----------|-------------------------------|-----------|-----------|------------|-----------|-----------|
|                                                                      | BHI 336 24h                      |           |           | LJE 336 24h |           |           | BHI 334 4h                    |           |           | LJE 334 4h |           |           |
| Initial culture conc.<br>(Log CFU/mL)                                | <i>Ec</i>                        | <i>Se</i> | <i>Lm</i> | <i>Ec</i>   | <i>Se</i> | <i>Lm</i> | <i>Ec</i>                     | <i>Se</i> | <i>Lm</i> | <i>Ec</i>  | <i>Se</i> | <i>Lm</i> |
|                                                                      | 2.9                              | 3.1       | 4.3       | 3.5         | 3.5       | 5.9       | 3.6                           | 3.5       | 4.7       | 3.6        | 3.3       | 5.5       |
| 24h/4h culture<br>conc. (Log<br>CFU/mL)                              | <i>Ec</i>                        | <i>Se</i> | <i>Lm</i> | <i>Ec</i>   | <i>Se</i> | <i>Lm</i> | <i>Ec</i>                     | <i>Se</i> | <i>Lm</i> | <i>Ec</i>  | <i>Se</i> | <i>Lm</i> |
|                                                                      | 8.7                              | 9.2       | 7.3       | 8.6         | 8.0       | 5.4       | 5.3                           | 5.0       | 5.7       | 4.5        | 3.6       | 4.5       |
| Sample size (mL)                                                     | 5.3                              |           |           | 5.0         |           |           | 0.2                           |           |           | 0.2        |           |           |
| RNA input for<br>multiplex RT-PCR<br>(ng)                            | -                                |           |           | -           |           |           | 72.0                          |           |           | 36.5       |           |           |
| Yield of cDNA<br>from multiplex RT-<br>PCR (ng)                      | -                                |           |           | -           |           |           | 1267.5                        |           |           | 705.2      |           |           |
| RNA/DNA input<br>for library prep<br>(ng)                            | 3490.2                           |           |           | 1338.0      |           |           | 33.8                          |           |           | 165.0      |           |           |
| Yield after Poly A<br>tailing and<br>purification (ng)               | 1824.0                           |           |           | 617.5       |           |           | -                             |           |           | -          |           |           |
| Yield after library<br>prep and Nanopore<br>sequencing input<br>(ng) | 744.0                            |           |           | 129.2       |           |           | <30.0<br>Too low to<br>detect |           |           | 125.0      |           |           |

TABLE S3 Primer information for qPCR, RT-qPCR and multiplex RT-PCR.

| Species   | Target Gene* | Primer (5'-3')                                           | Product Size (bp) | Reference |
|-----------|--------------|----------------------------------------------------------|-------------------|-----------|
| <i>Ec</i> | <i>stx</i>   | F:GAGCGAAATAATTTATATGTG<br>R: TGATGATGGCAATTCAGTAT       | 520               | (1-3)     |
|           | <i>stx1A</i> | F: TGACAGGATTTGTTAACAGGAC<br>R: TCTGTATTTGCCGAAAACGT     | 294               | (1-3)     |
| <i>Se</i> | <i>invA</i>  | F:ACAGTGCTCGTTTACGACCTGAAT<br>R:AGACGACTGGTACTGATCGATAAT | 244               | (3, 4)    |
| <i>Lm</i> | <i>inlA</i>  | F:GATTAACACGAGTAACGG                                     | 153               | (3, 5, 6) |

\* *stx1A* was used in qPCR and RT-qPCR of *E. coli* O157:H7. *stx*, *invA* and *inlA* were used in multiplex RT-PCR of 4-hour BHI and 4-hour LJE cocktail cultures.

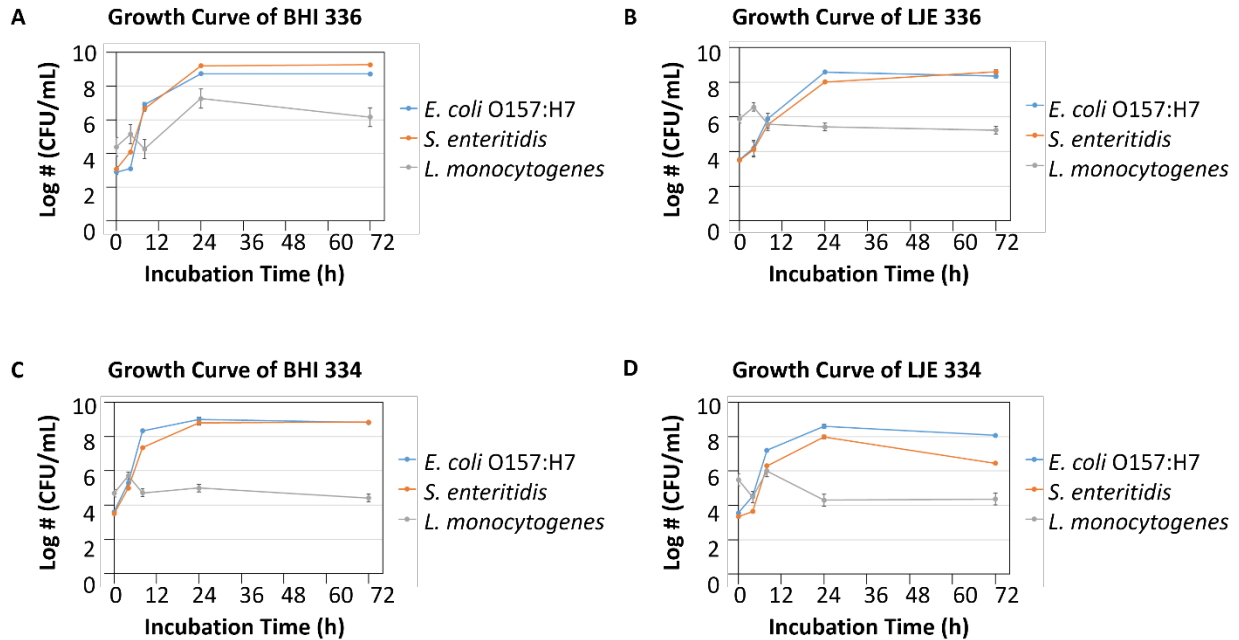

S1 Fig. The growth curve of cocktail culture of *E. coli* O157:H7, *S. enteritidis* and *L. monocytogenes* at 0, 4, 8, 24 and 72 h in BHI and LJE at 37 °C. (A) The growth curve of cocktail culture of *E. coli* O157:H7 (3-log), *S. enteritidis* (3-log) and *L. monocytogenes* (6-log) at 0, 4, 8, 24 and 72 h in BHI. (B) The growth curve of cocktail culture of *E. coli* O157:H7 (3-log), *S. enteritidis* (3-log) and *L. monocytogenes* (6-log) at 0, 4, 8, 24 and 72 h in LJE. (C) The growth curve of cocktail culture of *E. coli* O157:H7 (3-log), *S. enteritidis* (3-log) and *L. monocytogenes* (4-log) at 0, 4, 8, 24 and 72 h in BHI. (D) The growth curve of cocktail culture of *E. coli* O157:H7 (3-log), *S. enteritidis* (3-log) and *L. monocytogenes* (4-log) at 0, 4, 8, 24 and 72 h in LJE.

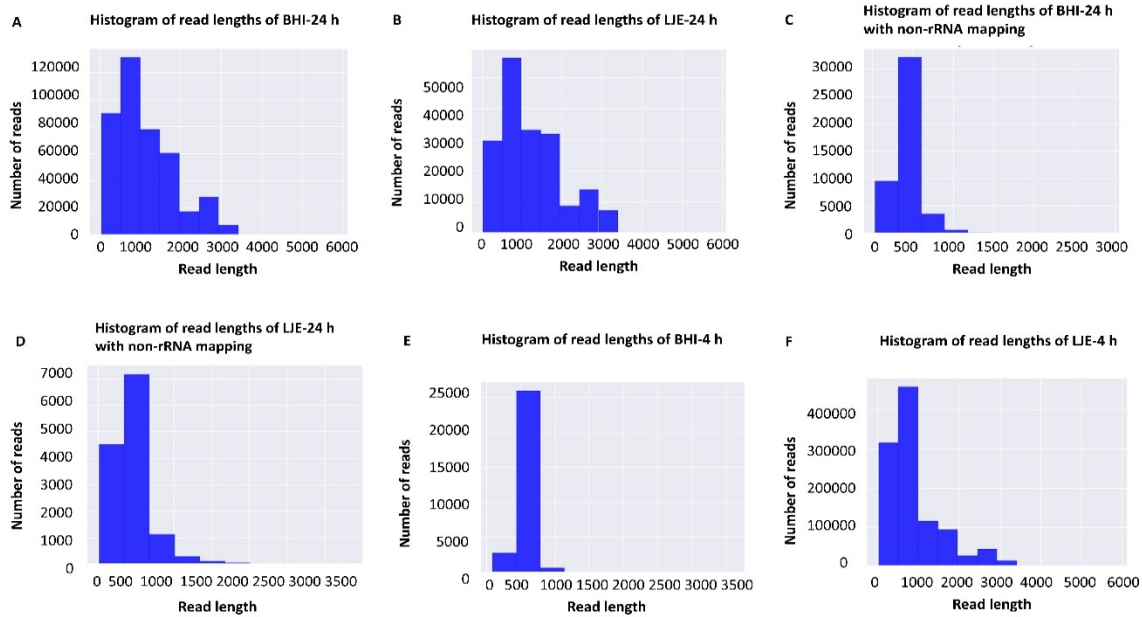

S2 Fig. The number of reads and read lengths of MinION R9.4 Rev D direct metatranscriptome RNA-seq and RT-PCR amplicon sequencing for BHI and LJE samples collected from 4 h and 24 h. Results of direct metatranscriptome RNA-seq. (A) BHI-24 h; (B) LJE-24 h; (C) BHI-24 h with non-rRNA mapping; (D) LJE-24 h with non-rRNA mapping. Results of RT-PCR amplicon sequencing of (E) BHI-4 h; (F) LJE-4 h.

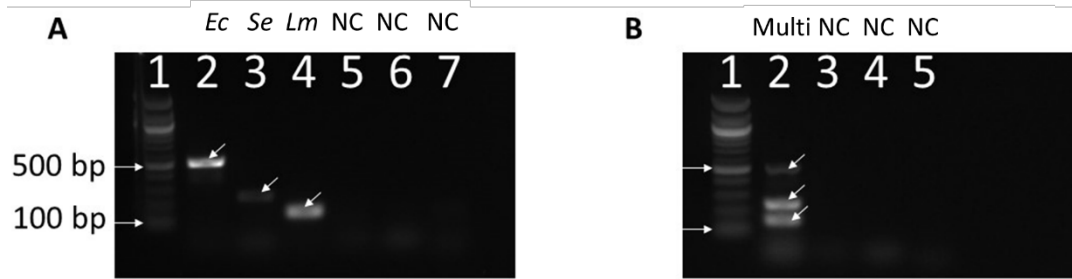

S3 Fig. Gel image of RT-PCR amplicons were used to verify the present of all three bacteria in the cocktail culture, and PCR was used to verify the complete removal of DNA contaminations using the protocol described above. (A) Non-multiplex RT-PCR of *E. coli* O157:H7 (*Ec*), *S. enteritidis* (*Se*) or *L. monocytogenes* (*Lm*) from 24-hour cocktail culture in LJE. From left to right: 1. 100-bp DNA Ladder (NEB); 2. *E. coli* O157:H7 in LJE 24-hour cocktail culture; 3. *S. enteritidis* in LJE 24-hour cocktail culture; 4. *L. monocytogenes* in LJE 24-hour cocktail culture. 5. Negative control (NC) of *E. coli* O157:H7 in LJE 24-hour cocktail culture; 6. Negative control of *S. enteritidis* in LJE 24-hour cocktail culture; 7. Negative control of *L. monocytogenes* in LJE 24-hour cocktail culture. (B) Multiplex RT-PCR (Multi) of *E. coli* O157:H7, *S. enteritidis* and *L. monocytogenes* 4-hour cocktail in LJE. From left to right: 1. 100-bp DNA Ladder; 2. Multiplex RT-PCR of *E. coli* O157:H7, *S. enteritidis* and *L. monocytogenes*; 3. Negative control of *E. coli* O157:H7 (PCR without RT); 4. Negative control of *S. enteritidis* (PCR without RT); 5. Negative control of *L. monocytogenes* (PCR without RT).

## References

1. Zhang W-L, Bielaszewska M, Liesegang A, Tschäpe H, Schmidt H, Bitzan M, Karch H. 2000. Molecular characteristics and epidemiological significance of shiga toxin-producing *Escherichia coli* O26 strains. *Journal of Clinical Microbiology* 38:2134-2140.
2. Toma C, Lu Y, Higa N, Nakasone N, Chinen I, Baschkier A, Rivas M, Iwanaga M. 2003. Multiplex PCR assay for identification of human diarrheagenic *Escherichia coli*. *J Clin Microbiol* 41:2669-71.
3. Nguyen TT, Van Giau V, Vo TK. 2016. Multiplex PCR for simultaneous identification of *E. coli* O157:H7, *Salmonella spp.* and *L. monocytogenes* in food. *3 Biotech* 6:205.
4. van der Velden AW, Lindgren SW, Worley MJ, Heffron F. 2000. Salmonella pathogenicity island 1-independent induction of apoptosis in infected macrophages by *Salmonella enterica* serotype typhimurium. *Infect Immun* 68:5702-9.
5. Vázquez-Boland JA, Kuhn M, Berche P, Chakraborty T, Domínguez-Bernal G, Goebel W, González-Zorn B, Wehland J, Kreft J. 2001. *Listeria* pathogenesis and molecular virulence determinants. *Clin Microbiol Rev* 14:584-640.
6. Xiao L, Zhang L, Wang HH. 2012. Critical issues in detecting viable *Listeria monocytogenes* cells by real-time reverse transcriptase PCR. *Journal of food protection* 75:512-517.
